# Supplementary material
Source: publisher site journal article supplement (https://www.dovepress.com/article/406802)
Supplement: Supplementary file 1 [file get_supplementary_file.php]

Supplementary table 1 DEMs in GSE41922

| miRNA | Log FC | P Value |
| --- | --- | --- |
| hsa-miR-1 | 3.58613 | 1.60E-09 |
| hsa-miR-133b | 3.40556 | 1.25E-08 |
| hsa-miR-133a | 3.2904 | 3.66E-08 |
| hsa-miR-10b | 1.77241 | 5.32E-08 |
| hsa-miR-92a | 1.34431 | 1.02E-07 |
| hsa-miR-7 | 1.6423 | 4.08E-07 |
| hsa-miR-486-5p | 1.65469 | 4.16E-07 |
| hsa-miR-423-5p_2 | 1.09556 | 5.35E-07 |
| hsa-miR-185 | 1.03667 | 5.19E-06 |
| hsa-miR-214 | 1.79807 | 5.80E-06 |
| hsa-miR-338-3p | -1.01538 | 6.25E-06 |
| hsa-miR-16 | 1.30357 | 6.53E-06 |
| hsa-miR-144* | 1.00061 | 1.36E-05 |
| hsa-miR-296-5p | 1.39183 | 2.04E-05 |
| hsa-miR-576-5p | 1.04741 | 2.62E-05 |
| hsa-miR-16-2* | 1.07653 | 2.75E-05 |
| hsa-miR-18a* | 1.37909 | 8.55E-05 |
| hsa-miR-20b | 1.37259 | 1.60E-04 |
| hsa-miR-143 | 1.02174 | 2.05E-04 |
| hsa-miR-92b | 1.32773 | 2.50E-04 |
| hsa-miR-96 | 1.24809 | 4.13E-04 |
| hsa-miR-451 | 1.08777 | 4.31E-04 |
| hsa-miR-182 | 1.01186 | 5.53E-04 |
| hsa-miR-363 | 1.08751 | 5.58E-04 |
| hsa-miR-551a | -1.45725 | 6.06E-04 |
| hsa-miR-629 | 1.42387 | 7.03E-04 |
| hsa-miR-660 | 1.03189 | 7.75E-04 |
| hsa-miR-205 | 1.26544 | 2.93E-03 |
| hsa-miR-501-3p | 1.10987 | 3.05E-03 |
| hsa-miR-624* | 1.04373 | 4.53E-03 |
| hsa-miR-95 | 1.36189 | 4.65E-03 |
| hsa-miR-10a | 1.00745 | 6.54E-03 |
| hsa-miR-154 | 1.04409 | 1.17E-02 |
| hsa-miR-486-3p | 1.65176 | 1.52E-02 |
| hsa-miR-671-5p | 1.04956 | 2.71E-02 |
| hsa-miR-1974 | 1.00586 | 3.71E-02 |
| hsa-miR-122 | -1.01985 | 4.71E-02 |

Note: * represents miRNAs with low abundance.

Supplementary table 2 DEMs in GSE45666

| miRNA | Log FC | P Value |
| --- | --- | --- |
| hsa-miR-126-3p | 2.819163 | 0.00766 |
| hsa-miR-140-5p | 2.493079 | 0.009758 |
| hsa-miR-130a-3p | 2.14104 | 0.019315 |
| hsa-miR-146b-5p | 1.735409 | 0.01152 |
| hsa-miR-146a-5p | 1.844248 | 0.006426 |
| hsa-miR-148a-3p | 2.469321 | 0.032307 |
| hsa-miR-182-5p | 2.235581 | 0.008444 |
| hsa-miR-191-5p | 1.505145 | 0.018882 |
| hsa-miR-194-5p | 2.485877 | 0.037112 |
| hsa-miR-223-3p | 1.50453 | 0.02226 |
| hsa-miR-32-5p | 3.463427 | 0.009993 |
| hsa-miR-335-5p | 2.145936 | 0.014338 |
| hsa-miR-363-3p | 2.648077 | 0.001253 |
| hsa-miR-98-5p | 2.732916 | 0.005799 |
| hsa-miR-151a-5p | 1.904513 | 0.001408 |
| hsa-miR-301a-3p | 2.911574 | 0.009173 |
| hsa-miR-96-5p | 2.671409 | 0.003975 |
| hsa-miR-195-5p | 2.536921 | 0.007216 |
| hsa-miR-143-3p | 1.843032 | 0.007415 |
| hsa-miR-643 | 2.461292 | 0.002221 |
| hsa-miR-660-5p | 1.508061 | 0.014478 |
| hsa-miR-24-3p | 1.702007 | 0.031802 |
| hsa-miR-641 | 1.626482 | 0.004708 |
| hsa-miR-192-5p | 2.241504 | 0.000879 |
| hsa-let-7f-5p | 2.777093 | 0.006248 |
| hsa-miR-19b-1-5p | 1.941504 | 0.006461 |
| hsa-miR-301b | 2.280271 | 0.041879 |
| hsa-miR-106b-5p | 1.864783 | 0.006788 |
| hsa-miR-17-3p | 1.856887 | 0.01054 |
| hsa-miR-190a-5p | 3.516573 | 0.001827 |
| hsa-miR-30e-5p | 2.230846 | 0.031932 |
| hsa-miR-7-5p | 2.101254 | 0.001243 |
| hsa-miR-101-3p | 1.953091 | 0.020789 |
| hsa-miR-342-3p | 1.82923 | 0.039065 |
| hsa-miR-126-5p | 2.64514 | 0.019291 |
| hsa-miR-223-5p | 2.149336 | 0.040082 |
| hsa-miR-219a-5p | 1.625916 | 0.016426 |
| hsa-miR-140-3p | 1.525371 | 0.012926 |
| hsa-miR-541-3p | 1.612896 | 0.004792 |
| hsa-miR-20b-5p | 3.059757 | 0.009559 |
| hsa-miR-144-5p | 3.772125 | 0.003643 |
| hsa-miR-505-3p | 1.70828 | 0.005151 |
| hsa-miR-148b-5p | 1.684524 | 0.007337 |
| hsa-miR-339-5p | 1.528971 | 0.001868 |
| hsa-miR-93-3p | 1.7615 | 0.009434 |
| hsa-miR-548d-5p | 2.466605 | 0.006137 |
| hsa-miR-652-3p | 1.872841 | 0.007534 |
| hsa-miR-135a-5p | 1.859724 | 0.001007 |
| hsa-miR-16-2-3p | 2.228099 | 0.006738 |
| hsa-miR-331-3p | 1.824689 | 0.000873 |
| hsa-miR-450b-5p | 1.693229 | 0.006248 |
| hsa-miR-185-5p | 1.997347 | 0.002372 |
| hsa-miR-30c-5p | 2.099234 | 0.002925 |
| hsa-miR-545-5p | 2.889132 | 0.003359 |
| hsa-miR-424-5p | 2.294141 | 0.007759 |
| hsa-miR-548l | 1.574885 | 0.049443 |
| hsa-let-7g-5p | 2.906353 | 0.002608 |
| hsa-miR-548j-5p | 1.626919 | 0.001406 |
| hsa-miR-526b-5p | 1.530088 | 0.025267 |
| hsa-miR-106a-5p | 1.885972 | 0.042236 |
| hsa-miR-1297 | 2.649606 | 0.025393 |
| hsa-miR-30e-3p | 2.170472 | 0.005131 |
| hsa-miR-499a-3p | 1.984606 | 0.00644 |
| hsa-miR-501-3p | 1.544485 | 0.016545 |
| hsa-let-7i-3p | 1.996803 | 0.007608 |
| hsa-miR-625-5p | 1.571324 | 0.000709 |
| hsa-miR-20a-5p | 2.793199 | 0.009209 |
| hsa-let-7d-5p | 1.733474 | 0.046245 |
| hsa-miR-1911-5p | 1.718859 | 0.018588 |
| hsa-miR-26b-5p | 2.98713 | 0.003311 |
| hsa-miR-30b-5p | 2.662942 | 0.004418 |
| hsa-let-7a-5p | 2.634033 | 0.038201 |
| hsa-miR-26a-5p | 2.642071 | 0.031917 |
| hsa-miR-3613-5p | 2.015501 | 0.041972 |
| hsa-miR-21-5p | 1.918524 | 0.018663 |
| hsa-miR-500a-5p/hsa-miR-500b-5p | 1.655744 | 0.033709 |
| hsa-miR-548w | 1.603742 | 0.006251 |
| hsa-miR-548v | 1.7341 | 0.006748 |
| hsa-miR-4289 | 2.411986 | 0.042834 |
| hsa-miR-323b-3p | 2.128601 | 0.00059 |
| hsa-miR-4325 | 1.885835 | 0.031073 |
| hsa-miR-548aa/hsa-miR-548t-3p | 2.384543 | 0.001211 |
| hsa-miR-374b-5p | 2.217938 | 0.001789 |
| hsa-miR-550b-3p | 1.516462 | 0.000955 |
| hsa-miR-3908 | 1.871271 | 0.004012 |
| hsa-miR-374c-5p | 2.647165 | 0.01453 |
| hsa-miR-454-3p | 3.348565 | 0.006529 |
| hsa-miR-942-5p | 1.917492 | 0.001329 |
| hsa-miR-34b-3p | 1.523453 | 0.006185 |
| hsa-miR-4536-3p | 1.565372 | 0.044908 |
| hsa-miR-4659a-5p | 1.557334 | 0.003329 |
| hsa-miR-151a-5p/hsa-miR-151b | 1.885058 | 0.002748 |
| hsa-miR-5582-5p | 1.741347 | 0.010304 |
| hsa-miR-130b-5p | 1.584766 | 0.006752 |
| hsa-miR-4659b-3p | 1.764587 | 0.014123 |
| hsa-miR-5186 | 1.543486 | 0.036661 |
| hsa-miR-5003-5p | 1.577233 | 0.00159 |
| hsa-miR-4659b-5p | 1.757146 | 0.003347 |
| hsa-miR-4676-3p | 2.157489 | 0.001375 |
| hsa-miR-23b-3p | 1.7128 | 0.040212 |
| hsa-miR-17-5p | 2.383872 | 0.011814 |
| hsa-miR-4500 | 1.712869 | 0.008927 |

Supplementary table 3 DEMs in GSE83270

| miRNA | Log FC | P Value |
| --- | --- | --- |
| hsa-miR-139-5p | -4.058138 | 1.09E-21 |
| hsa-miR-99a | -3.084548 | 1.98E-17 |
| hsa-miR-195 | -2.577472 | 7.93E-17 |
| hsa-miR-483-3p | -2.418442 | 1.75E-16 |
| hsa-miR-125b-2* | -2.575391 | 2.65E-16 |
| hsa-miR-497 | -2.31562 | 1.27E-15 |
| hsa-miR-125b | -2.911445 | 1.58E-15 |
| hsa-miR-10b | -2.30652 | 1.52E-13 |
| hsa-miR-182 | 2.696692 | 3.15E-13 |
| hsa-miR-100 | -2.759842 | 3.96E-13 |
| hsa-miR-378 | -1.950365 | 9.77E-13 |
| hsa-miR-126 | -1.660885 | 1.06E-12 |
| hsa-miR-328 | -1.897696 | 2.12E-12 |
| hsa-miR-10b* | -2.107106 | 2.29E-12 |
| hsa-miR-425 | 1.878102 | 2.80E-12 |
| hsa-miR-145* | -2.30959 | 4.31E-12 |
| hsa-miR-21 | 1.691297 | 4.56E-12 |
| hsa-miR-130b | 1.656109 | 4.62E-12 |
| hsa-miR-21* | 2.399551 | 1.26E-11 |
| hsa-miR-155 | 2.093893 | 3.24E-11 |
| hsa-miR-601 | -2.321251 | 3.44E-11 |
| hsa-miR-210 | 2.323602 | 5.99E-11 |
| hsa-miR-126* | -2.372048 | 7.99E-11 |
| hsa-miR-720 | 2.209176 | 1.45E-10 |
| hsa-miR-183 | 2.276513 | 1.49E-10 |
| hsa-miR-30e* | -1.579477 | 1.54E-10 |
| hsa-let-7c | -1.908333 | 2.08E-10 |
| hsa-miR-145 | -2.594471 | 2.76E-10 |
| hsa-miR-96 | 2.239955 | 3.98E-10 |
| hsa-miR-154 | -2.179205 | 4.59E-10 |
| hsa-miR-140-5p | -1.406183 | 5.53E-10 |
| hsa-miR-486-5p | -2.067161 | 8.05E-10 |
| hsa-miR-132* | -1.634013 | 8.47E-10 |
| hsa-miR-15b* | 1.622523 | 8.94E-10 |
| hsa-miR-1207-5p | -1.700573 | 1.34E-09 |
| hsa-miR-30c | -2.105617 | 1.40E-09 |
| hsa-miR-30a* | -2.488069 | 1.43E-09 |
| hsa-miR-140-3p | -1.391722 | 1.60E-09 |
| hsa-miR-299-5p | -2.17947 | 1.87E-09 |
| hsa-miR-638 | -1.352783 | 2.17E-09 |
| hsa-miR-134 | -1.553282 | 2.20E-09 |
| hsa-miR-185 | 1.355936 | 2.24E-09 |
| hsa-miR-93 | 1.701151 | 6.20E-09 |
| hcmv-miR-UL70-3p | -2.076958 | 6.24E-09 |
| hsa-miR-142-3p | 2.356258 | 6.79E-09 |
| hsa-miR-130a | -1.633107 | 7.17E-09 |
| hsa-miR-218 | -1.923145 | 8.41E-09 |
| hsa-miR-1290 | 2.50279 | 1.18E-08 |
| hsa-miR-320c | -1.050305 | 1.59E-08 |
| hsa-miR-320d | -1.062179 | 1.70E-08 |
| hsa-miR-1202 | -2.49608 | 1.93E-08 |
| hsa-miR-26a | -1.722296 | 2.44E-08 |
| hsa-miR-1260 | 1.897058 | 3.01E-08 |
| hsa-miR-1225-5p | -1.532908 | 3.27E-08 |
| hsa-let-7b | -1.405135 | 3.46E-08 |
| hsa-miR-188-5p | -1.554123 | 3.92E-08 |
| hsa-miR-1268 | -1.330255 | 5.62E-08 |
| hsa-miR-7 | 2.434303 | 6.63E-08 |
| hsa-miR-132 | -1.518221 | 6.81E-08 |
| hsa-miR-199b-5p | -2.554723 | 7.87E-08 |
| hsa-miR-30a | -2.16951 | 8.30E-08 |
| hsa-miR-335* | -1.876813 | 8.47E-08 |
| hsa-miR-143 | -2.358987 | 9.52E-08 |
| hsa-miR-654-3p | -2.066709 | 1.19E-07 |
| hsa-miR-141 | 1.908428 | 1.50E-07 |
| hsa-miR-572 | -1.704105 | 1.69E-07 |
| hsa-miR-451 | -1.976041 | 1.72E-07 |
| kshv-miR-K12-3 | -1.329435 | 1.74E-07 |
| hsa-miR-1271 | -1.888864 | 1.88E-07 |
| hsa-miR-139-3p | -1.439684 | 1.95E-07 |
| hsa-miR-133b | -2.065076 | 2.17E-07 |
| hsv1-miR-H1_v14.0 | -2.135519 | 2.36E-07 |
| hsa-miR-1915 | -1.03266 | 2.45E-07 |
| hsa-miR-20a* | -1.408814 | 2.93E-07 |
| hsa-miR-542-5p | -1.692126 | 3.75E-07 |
| hsa-miR-18a | 2.226433 | 3.82E-07 |
| hsa-miR-181b | 1.21947 | 7.59E-07 |
| hsa-miR-483-5p | -1.870368 | 7.72E-07 |
| hsa-miR-424 | -1.480532 | 9.39E-07 |
| hsa-miR-29a | -1.135474 | 9.55E-07 |
| hsa-miR-142-5p | 2.355674 | 1.26E-06 |
| hsa-miR-18b | 1.72786 | 1.43E-06 |
| hsa-miR-623 | -1.71038 | 1.81E-06 |
| hsa-miR-101 | -1.386807 | 1.90E-06 |
| hsa-miR-495 | -2.040742 | 2.44E-06 |
| hsa-miR-30c-2* | -1.472506 | 2.87E-06 |
| hsa-miR-377 | -1.945133 | 3.00E-06 |
| hsa-miR-127-3p | -1.750286 | 3.63E-06 |
| hsa-miR-106b | 1.195253 | 4.17E-06 |
| hsa-miR-1274a_v16.0 | 2.107262 | 4.35E-06 |
| hsa-miR-30c-1* | -1.130187 | 6.32E-06 |
| hsa-miR-30b* | -1.005311 | 7.37E-06 |
| hsa-miR-1280 | 1.316274 | 9.98E-06 |
| hsa-miR-150* | -1.245226 | 1.14E-05 |
| hsa-miR-16-2* | 1.037206 | 1.21E-05 |
| hsa-miR-19b-1* | -1.22813 | 1.29E-05 |
| hsa-miR-671-5p | -1.310342 | 1.36E-05 |
| hsa-miR-1308_v15.0 | 1.645906 | 1.46E-05 |
| hsa-miR-629* | 1.245097 | 1.78E-05 |
| hsa-miR-1826_v15.0 | -1.439814 | 2.46E-05 |
| hsa-miR-939 | -1.178826 | 3.33E-05 |
| hsa-miR-1274b_v16.0 | 1.599016 | 4.87E-05 |
| hsa-let-7a* | -1.129846 | 5.56E-05 |
| hsa-miR-29a* | -1.100564 | 6.07E-05 |
| hsa-miR-1224-5p | -1.014495 | 6.14E-05 |
| hsa-miR-1275 | -1.220747 | 6.73E-05 |
| hsa-miR-338-3p | -1.237427 | 7.55E-05 |
| hsa-miR-340 | 1.150828 | 1.15E-04 |
| hsa-miR-513a-5p | -1.225926 | 1.16E-04 |
| hsa-miR-429 | 1.4292 | 1.30E-04 |
| hsa-miR-940 | -1.037189 | 1.81E-04 |
| hsa-miR-30b | -1.099062 | 1.88E-04 |
| hsa-miR-654-5p | -1.179944 | 1.95E-04 |
| hsa-miR-664 | -1.008992 | 2.49E-04 |
| hsa-miR-765 | -1.375844 | 3.05E-04 |
| hsa-miR-301a | 1.286903 | 3.09E-04 |
| hsa-miR-1307 | 1.042936 | 3.57E-04 |
| hsa-miR-1226* | -1.044132 | 5.01E-04 |
| hsa-miR-494 | -1.129913 | 7.86E-04 |
| hsa-miR-221 | -1.058776 | 9.48E-04 |
| hsa-miR-575 | -1.15808 | 1.10E-03 |
| hsa-miR-199a-3p | -1.11548 | 1.63E-03 |
| hsa-miR-10a | -1.151746 | 2.65E-03 |
| hsa-miR-199a-5p | -1.427636 | 2.89E-03 |
| hsa-miR-1246 | 1.396593 | 3.15E-03 |
| hsa-miR-136 | -1.264343 | 3.30E-03 |
| hsa-miR-214 | -1.025976 | 3.56E-03 |
| hsa-miR-222 | -1.006989 | 4.16E-03 |
| hsa-miR-1300_v13.0 | -1.054825 | 5.99E-03 |
| hsa-miR-203 | 1.177409 | 1.31E-02 |
| hsa-miR-664* | -1.009881 | 1.44E-02 |
| hsa-miR-196a | 1.131876 | 2.18E-02 |

Note: * represents miRNAs with low abundance.

Supplementary table 4 top 50 target genes of miR-501-3p

| Gene | Degree |
| --- | --- |
| CDH1 | 19 |
| CCND1 | 15 |
| MYCN | 11 |
| RPL15 | 11 |
| RAF1 | 10 |
| RPL35 | 10 |
| SEC61A1 | 10 |
| RPL18A | 10 |
| RPL19 | 10 |
| YY1 | 9 |
| CDKN1B | 9 |
| CDK6 | 9 |
| RPS16 | 9 |
| CDK4 | 8 |
| RPL8 | 8 |
| RPS12 | 8 |
| CDKN2C | 7 |
| APC | 7 |
| PPP2R5E | 7 |
| AXIN1 | 7 |
| KCNC3 | 7 |
| CBL | 7 |
| RALA | 7 |
| CCND2 | 7 |
| EXOC4 | 7 |
| EXOC6 | 7 |
| UCHL5 | 6 |
| CSNK1A1 | 6 |
| PLCG1 | 6 |
| SCN2A | 6 |
| RAP1A | 6 |
| STRN | 6 |
| ADCY2 | 5 |
| ARIH1 | 5 |
| LCP2 | 5 |
| TARDBP | 5 |
| COX7C | 5 |
| TIMM10 | 5 |
| GABPA | 5 |
| EXOC2 | 5 |
| EXOC5 | 5 |
| RAB3A | 5 |
| GNAQ | 4 |
| PAFAH1B1 | 4 |
| STRIP2 | 4 |
| UNC79 | 4 |
| UBE2H | 4 |
| COX6B1 | 4 |
| TIMM13 | 4 |
| ELAVL2 | 4 |


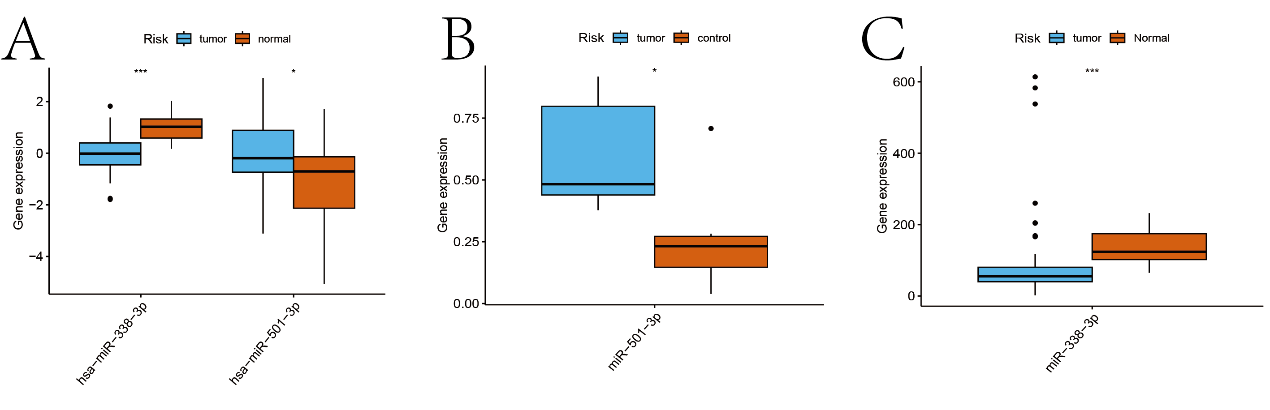


Supplementary figure 1 expression profile of different miRNAs as a bar plot. (A) GSE41922 (B) GSE83270(C) GSE45666. * P<0.05, ***P<0.001.
